# Supplementary material for: Additively manufacturable micro-mechanical logic gates
Source: Springer Nature journal article supplement (doi:10.1038/s41467-019-08678-0), 2019-02-20
Supplement: 41467_2019_8678_MOESM3_ESM.pdf [file 41467_2019_8678_MOESM3_ESM.pdf]

## **Description of Additional Supplementary Files**

**Supplementary Movie 1.** Actuation of the macroscale NAND and NOR logic gates as well as fabrication and testing of the microscale bi-stable mechanism.
